# Supplementary material for: Insulin amyloid fibril formation reduction by tripeptide stereoisomers
Source: Royal Society of Chemistry journal article supplement (doi:10.1039/d4nr00693c), 2024-01-01

## Supporting Information

### Insulin amyloid fibril formation reduction by tripeptide stereoisomers

Beatrice Rosetti,<sup>a</sup> Slavko Kralj,<sup>b,c</sup> Erica Scarel,<sup>a</sup> Simone Adorinni,<sup>a</sup> Barbara Rossi,<sup>d</sup> Attilio V. Vargiu,<sup>e</sup> Ana M. Garcia,<sup>\*f</sup> and Silvia Marchesan<sup>\*a</sup>

<sup>a</sup> Chem. Pharm. Sc. Dept., University of Trieste, 34127 Trieste, Italy.

<sup>b</sup> Materials Synthesis Dept., Jožef Stefan Institute, 1000 Ljubljana, Slovenia.

<sup>c</sup> Department of Pharmaceutical Technology, Faculty of Pharmacy, University of Ljubljana, 1000 Ljubljana, Slovenia.

<sup>d</sup> Elettra Sincrotrone Trieste Basovizza, 34149 Trieste, Italy

<sup>e</sup> Physics Department, University of Cagliari, 09042 Monserrato, Cagliari, Italy

<sup>f</sup> Facultad de Ciencias y Tecnologías Químicas, Instituto Regional de Investigación Científica Aplicada (IRICA), Universidad de Castilla-La Mancha, 13071 Ciudad Real, Spain

email: [anam.garcia@uclm.es](mailto:anam.garcia@uclm.es) & [smarchesan@units.it](mailto:smarchesan@units.it)

#### Table of Contents

|            |                                                                |    |
|------------|----------------------------------------------------------------|----|
| <b>S1.</b> | TEM micrographs of insulin fibrils.....                        | 2  |
| <b>S2.</b> | TEM micrographs of insulin fibrils with PFF.....               | 5  |
| <b>S3.</b> | TEM micrographs of insulin fibrils with pFf.....               | 8  |
| <b>S4.</b> | TEM micrographs of insulin fibrils with PFF .....              | 11 |
| <b>S5.</b> | TEM micrographs of the three tripeptides PFF, pFf and PFF..... | 14 |
| <b>S6.</b> | CD spectra of the tripeptides PFF, pFf and PFF.....            | 15 |
| <b>S7.</b> | DSC data for PFF alone.....                                    | 16 |
| <b>S8.</b> | UVRR spectra.....                                              | 17 |
| <b>S9.</b> | MD all-atom simulations.....                                   | 18 |

S1. TEM micrographs of insulin fibrils

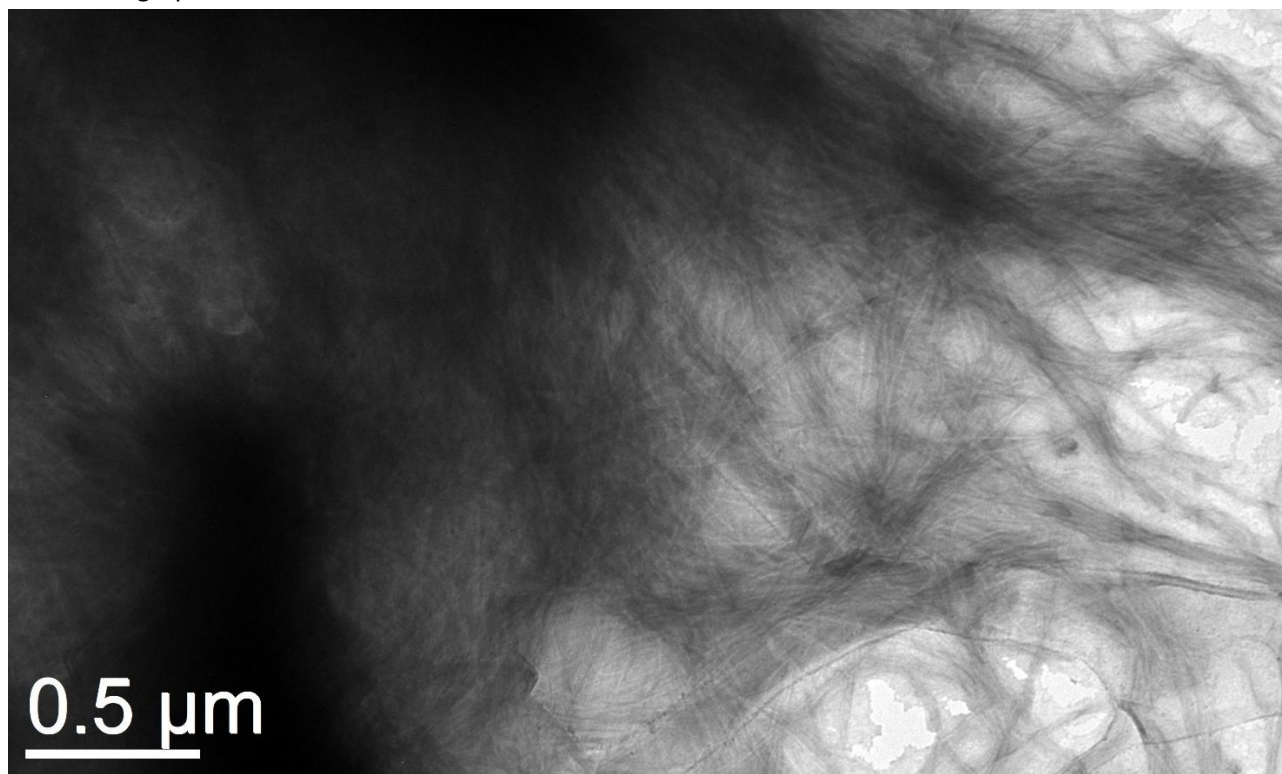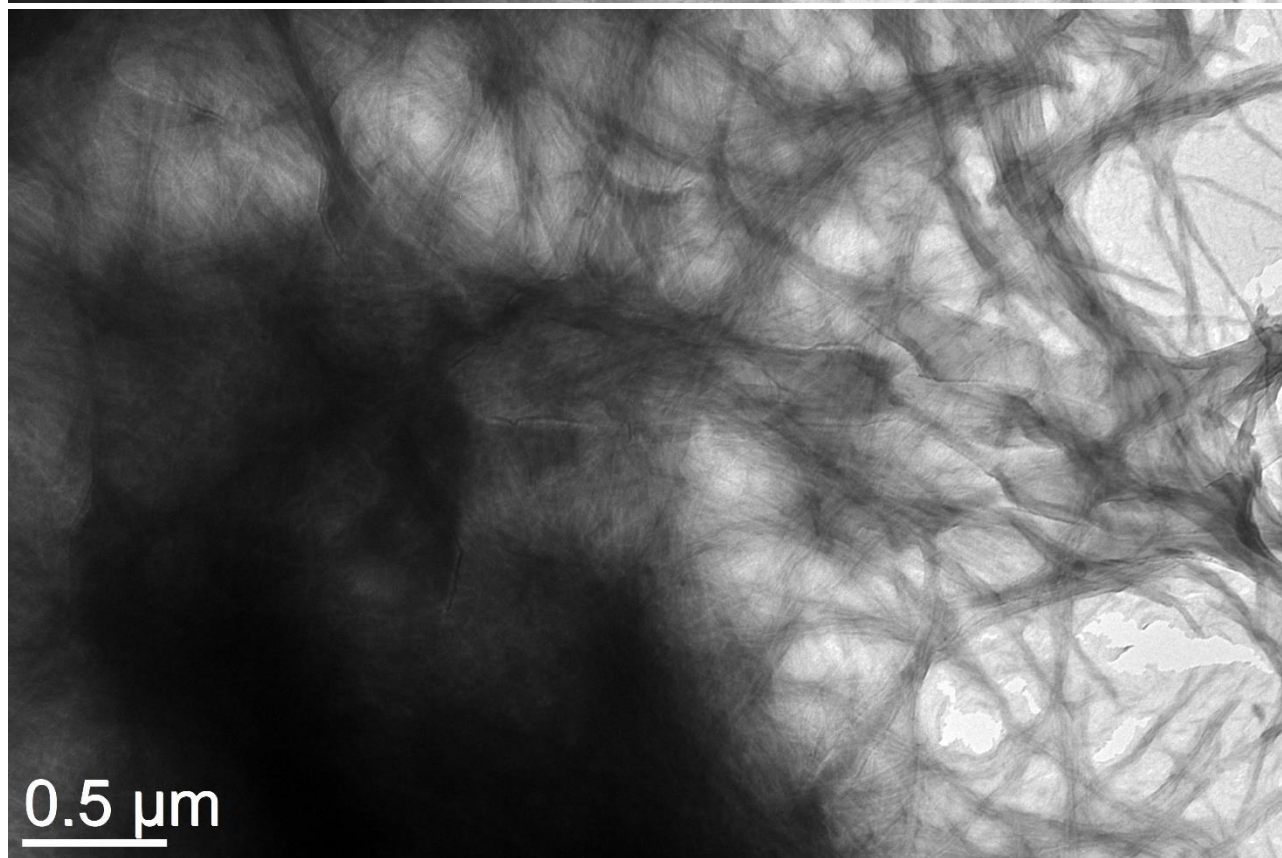

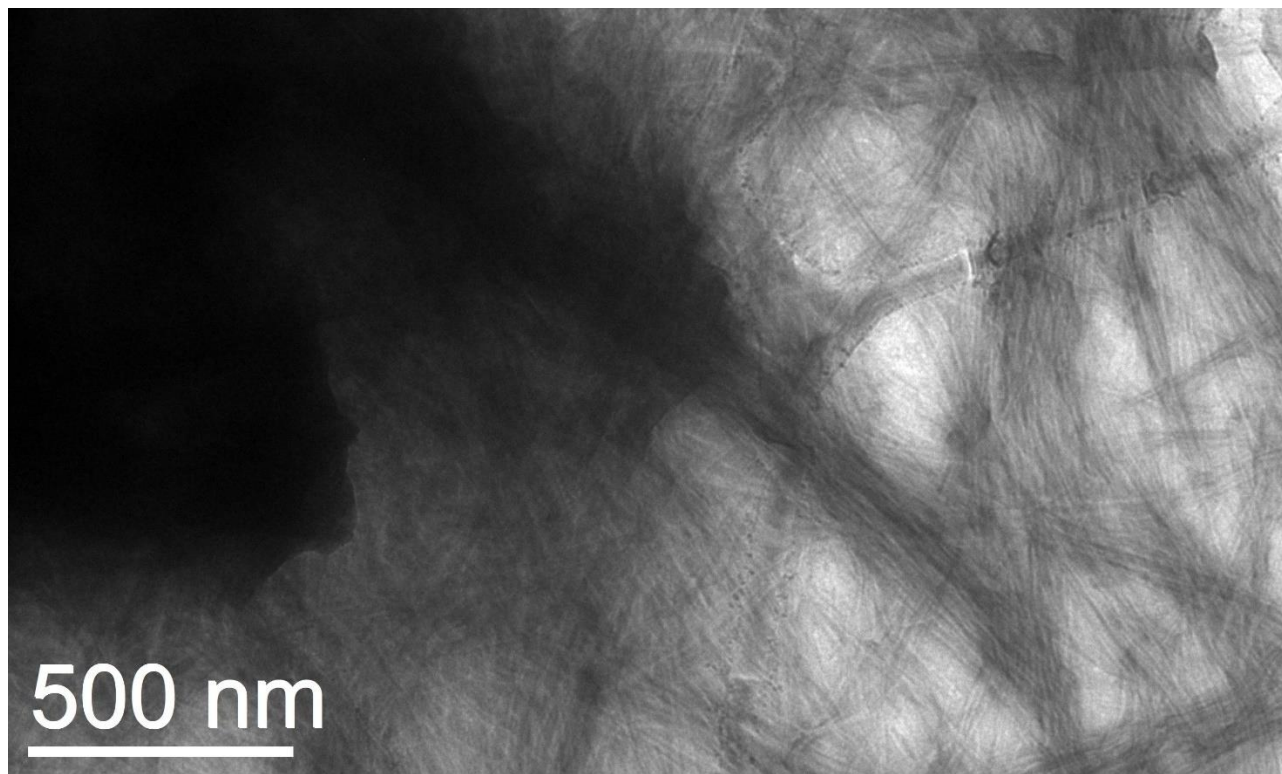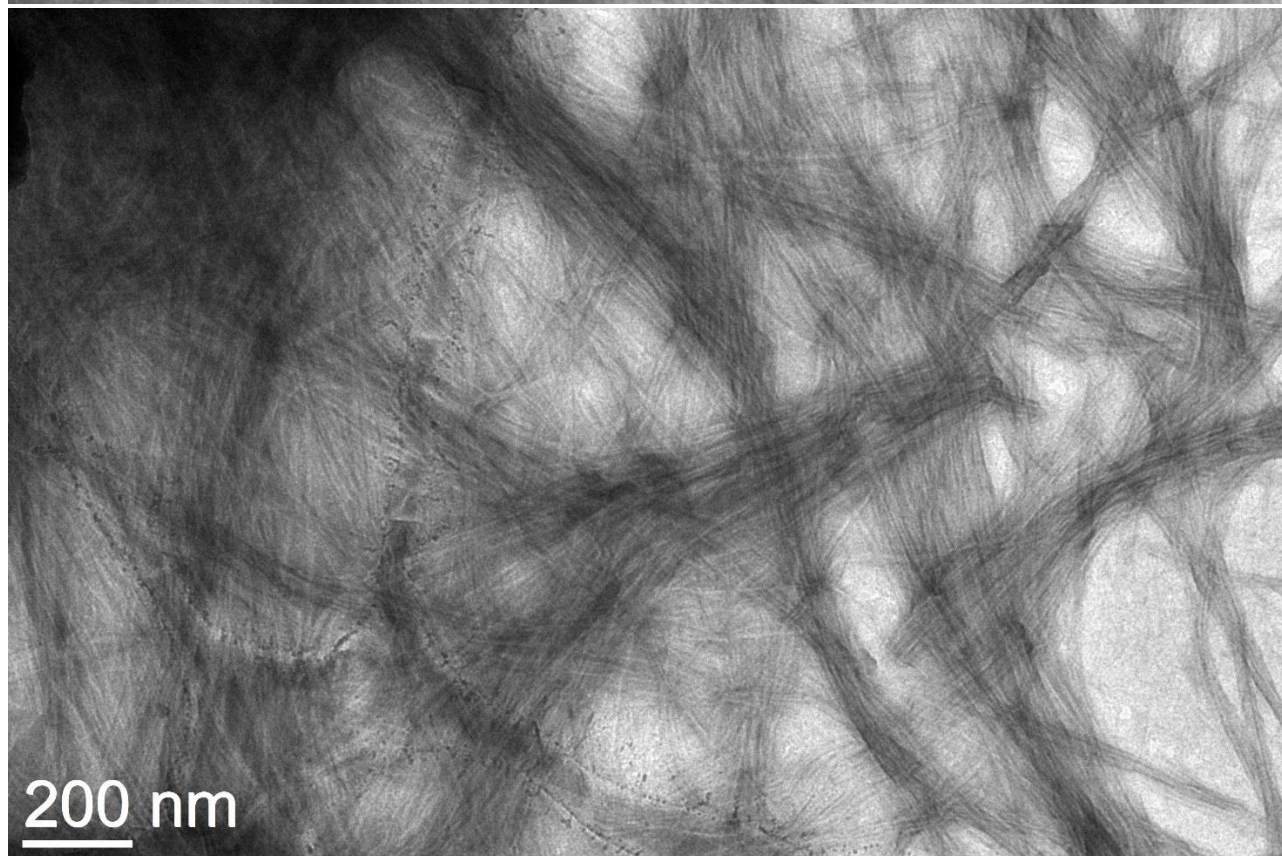

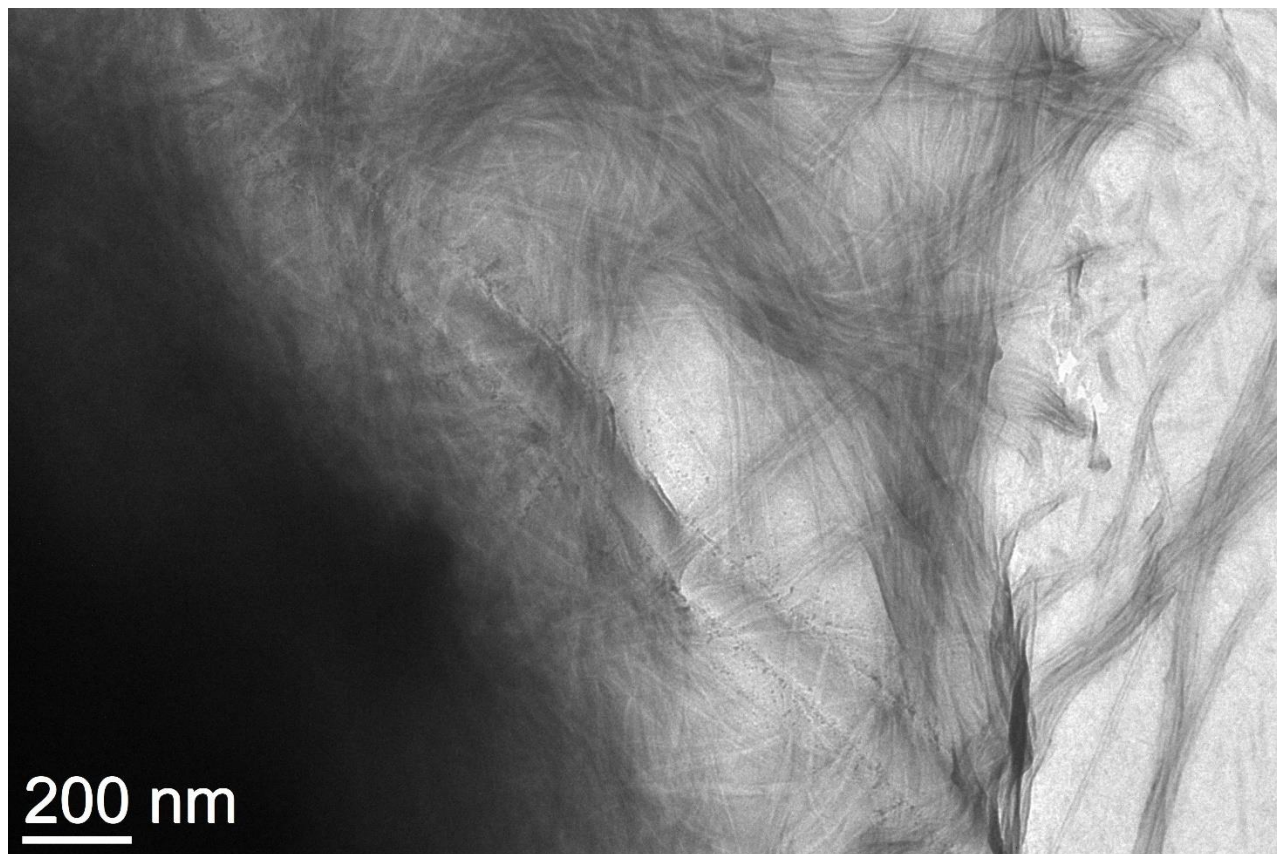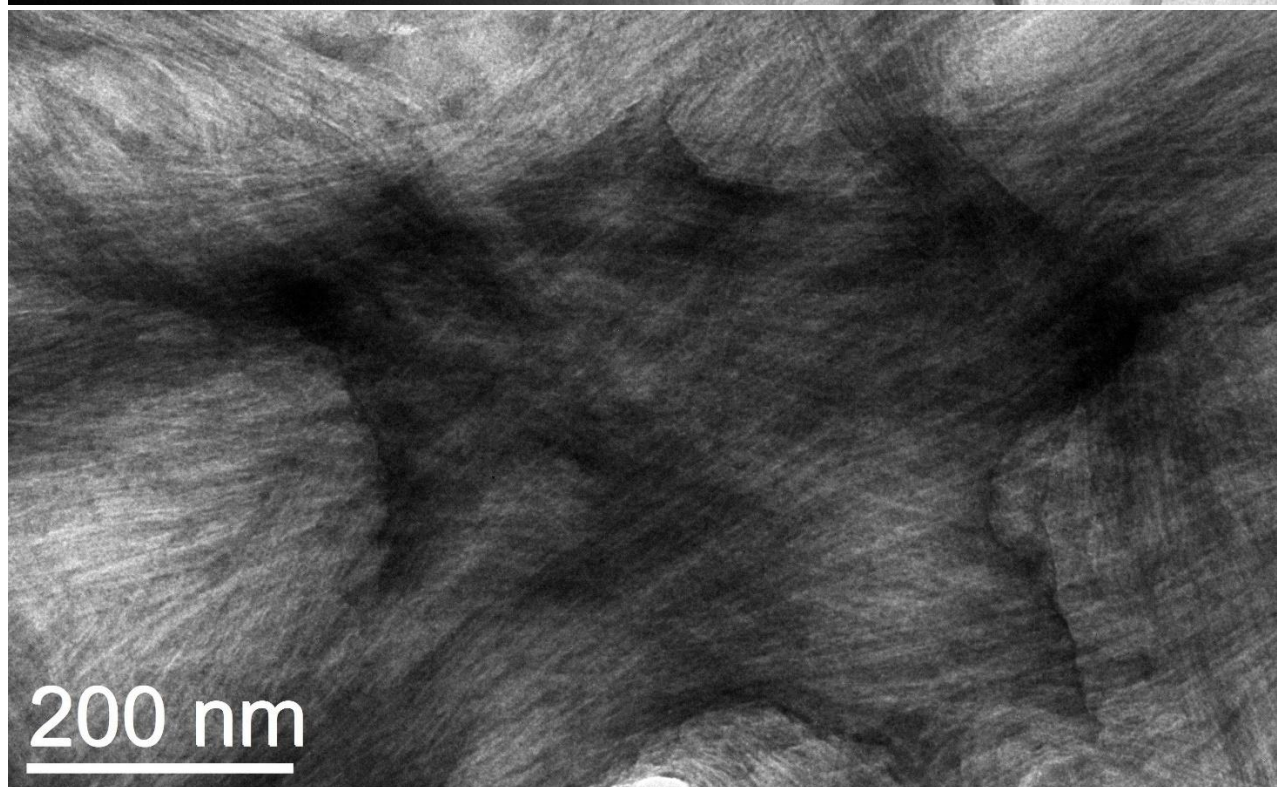

S2. TEM micrographs of insulin fibrils + PFF

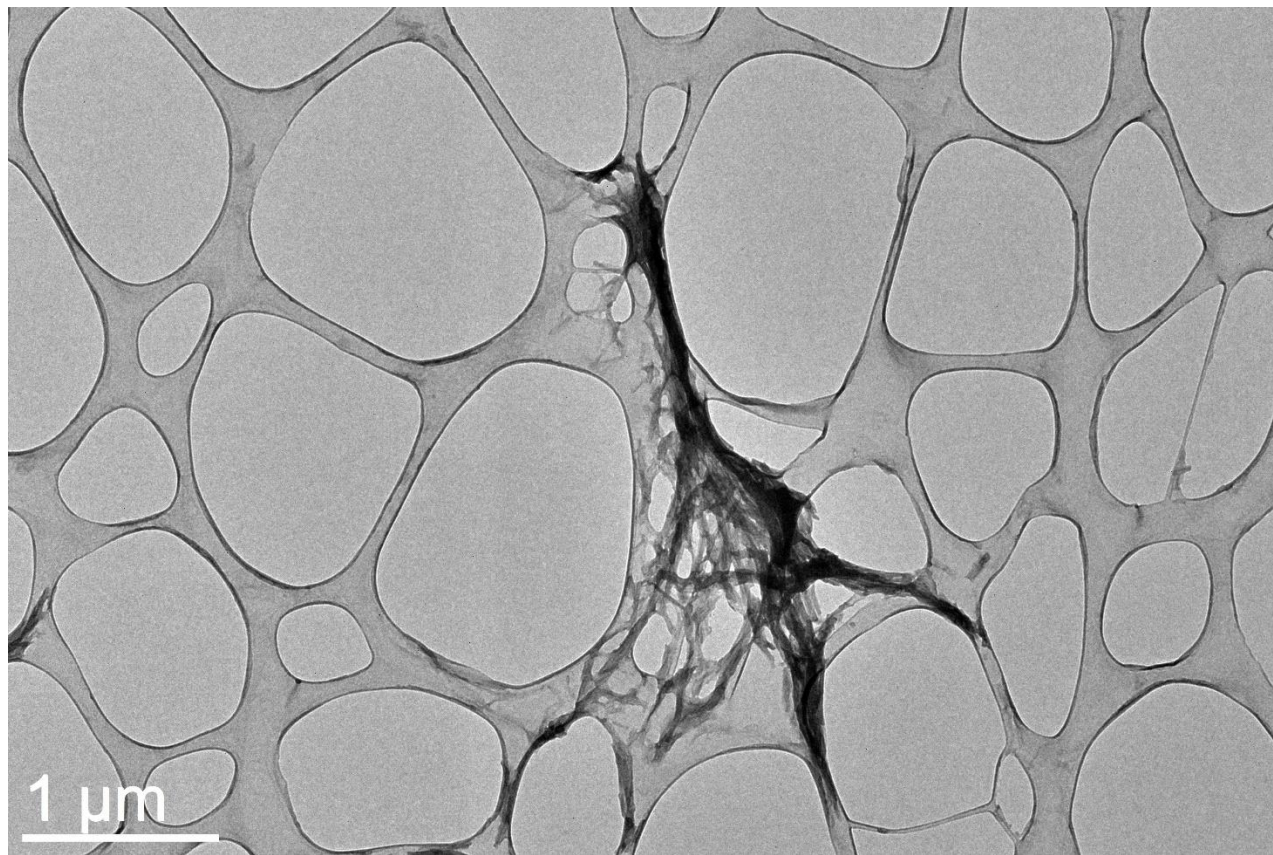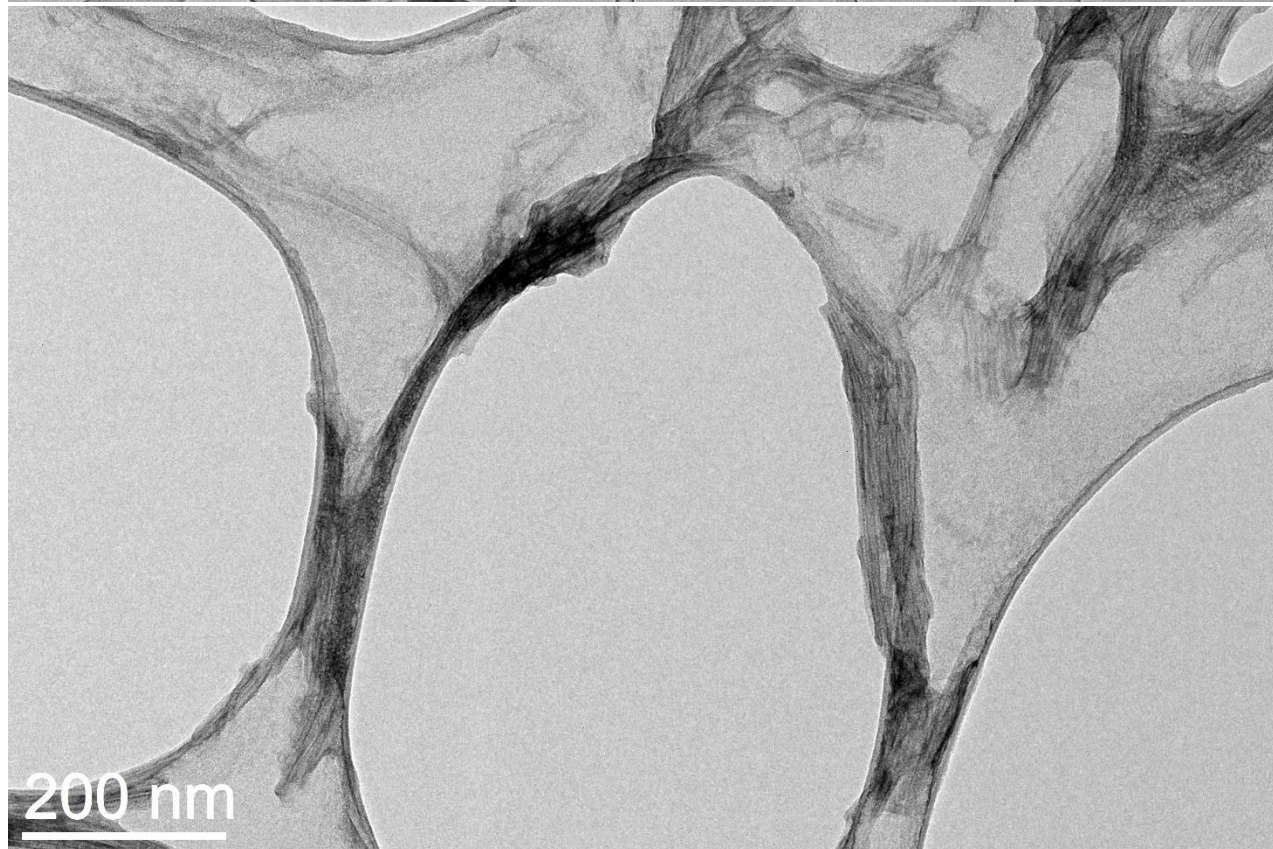

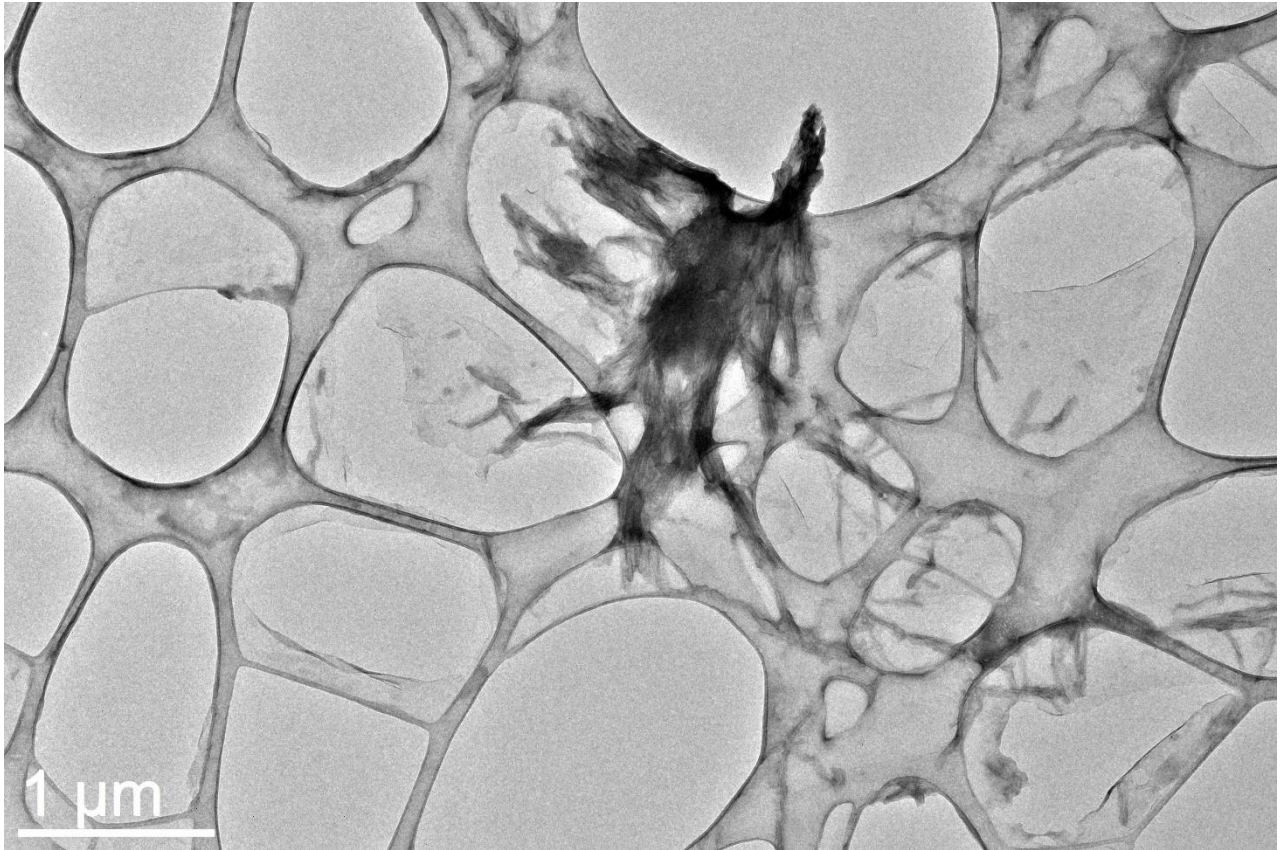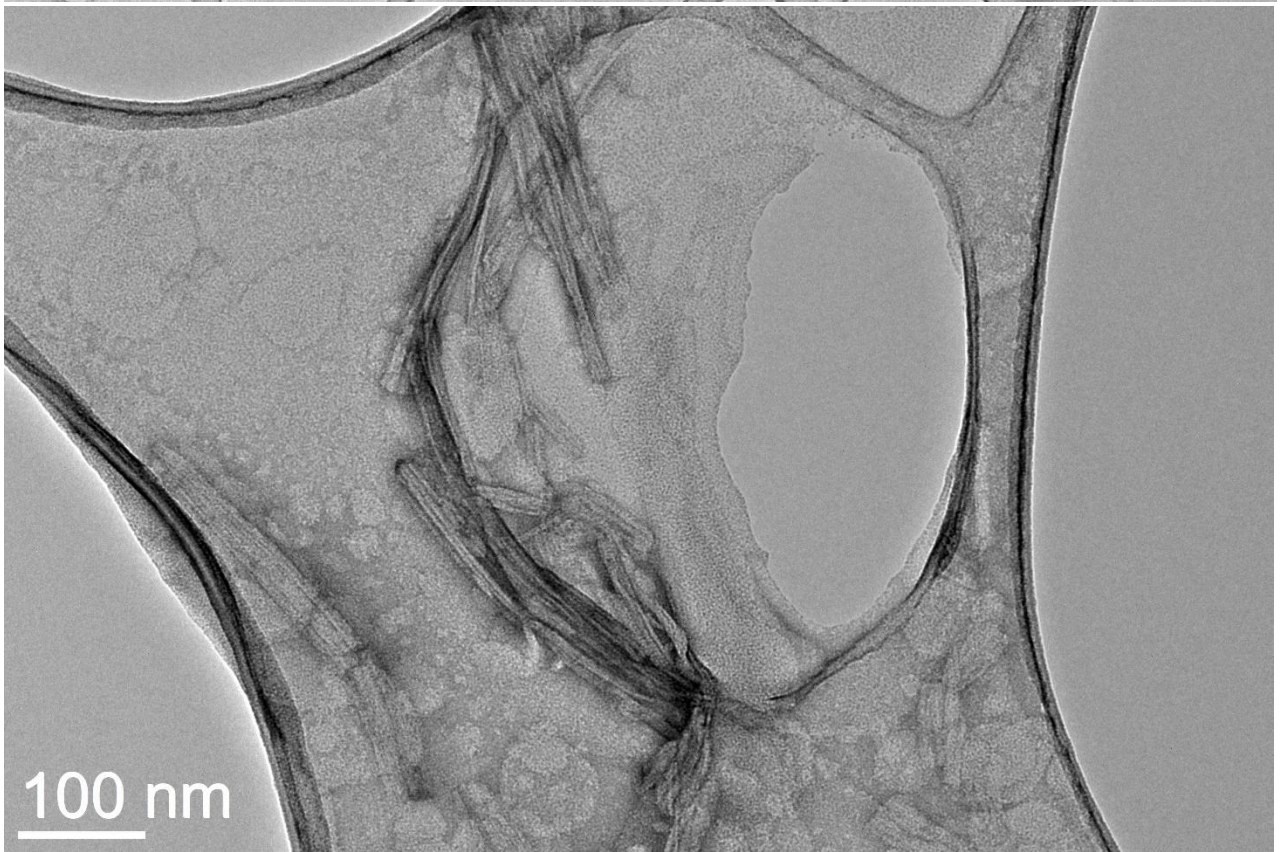

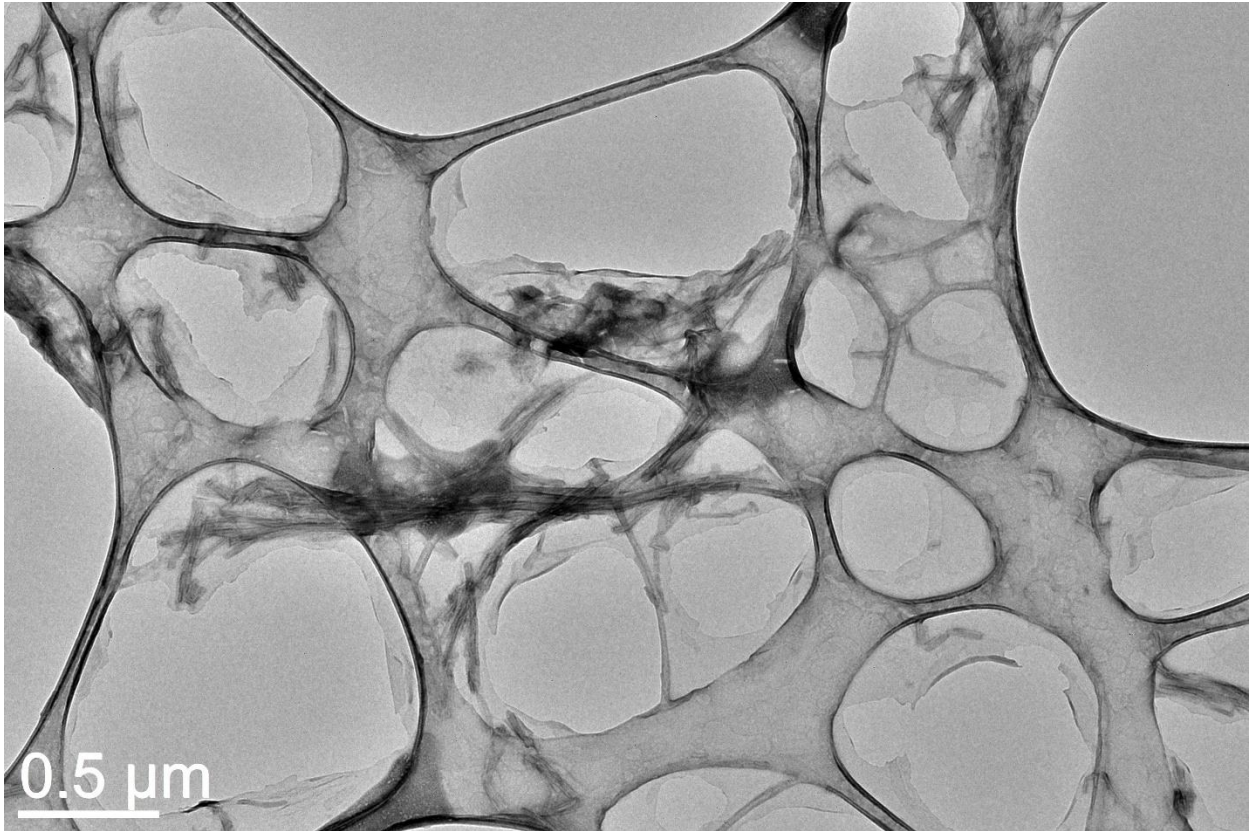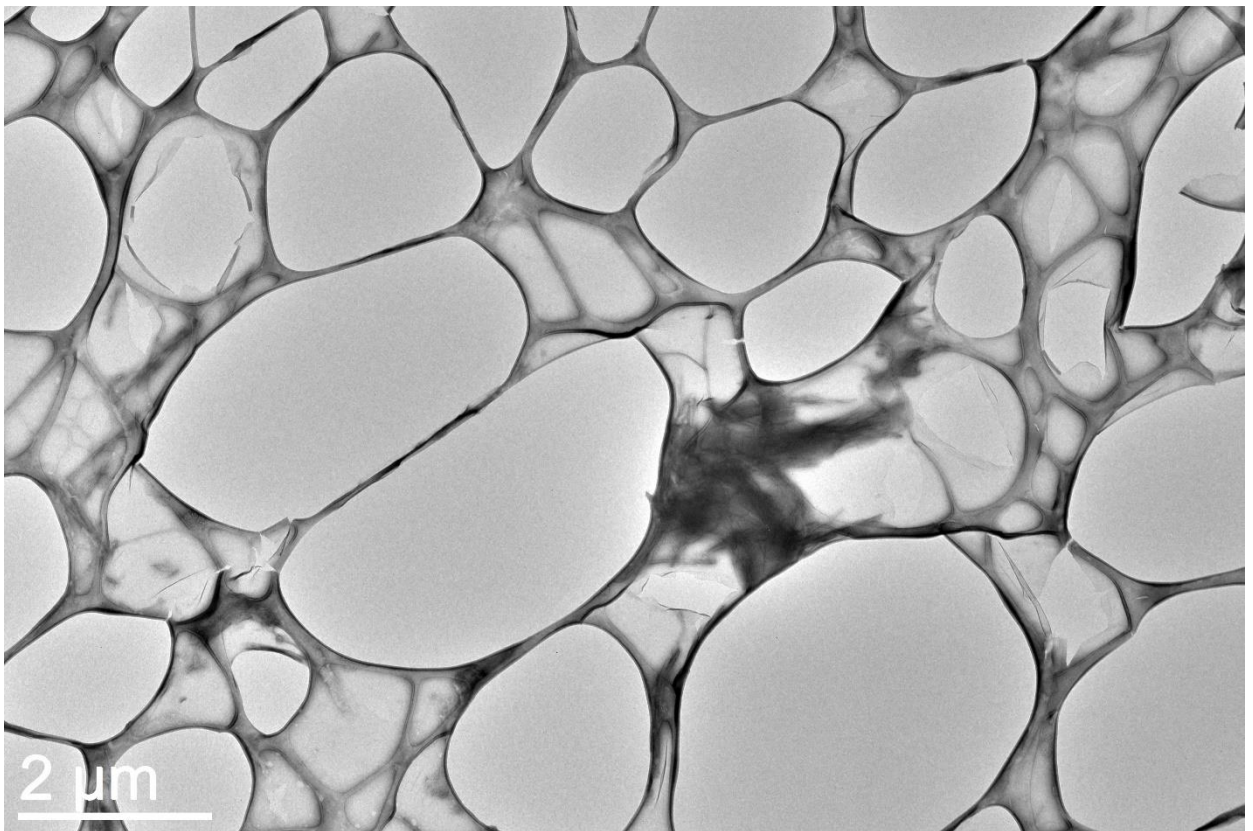

S3. TEM micrographs of insulin fibrils + pFf

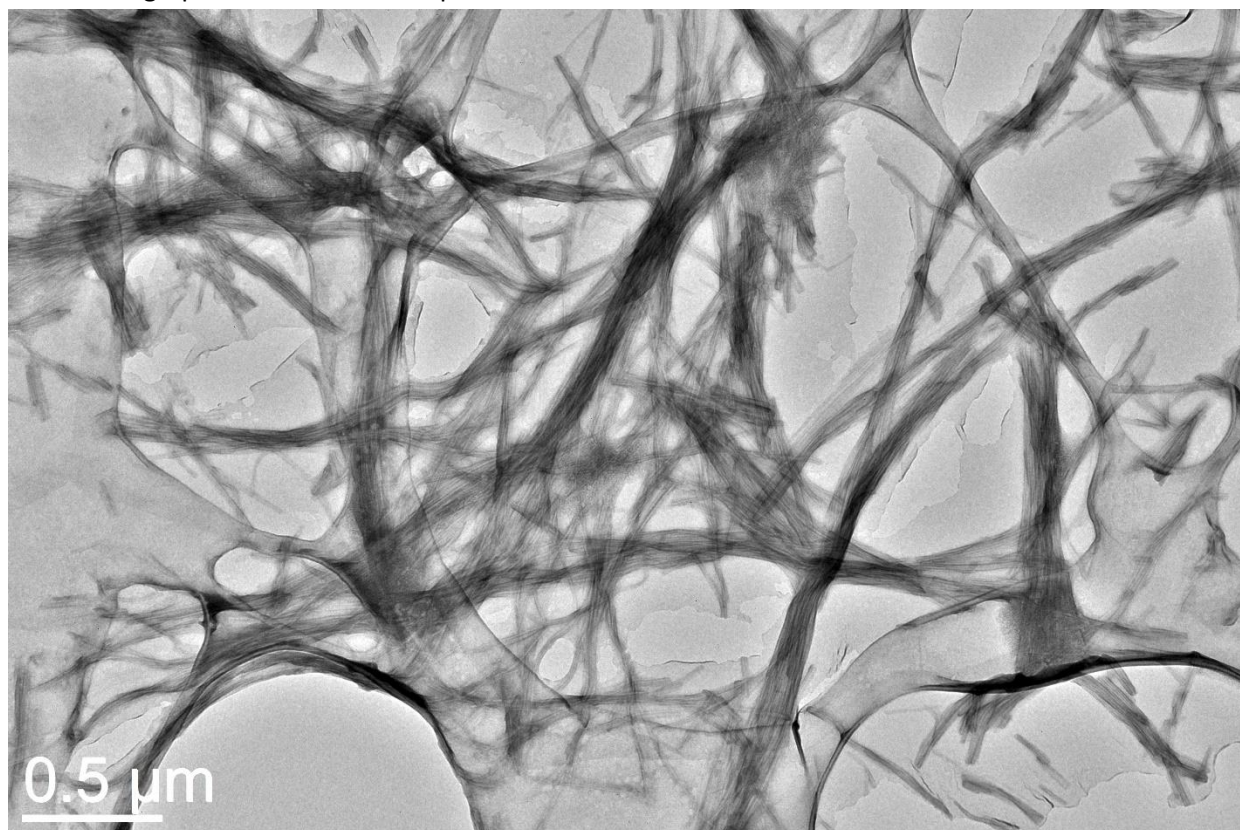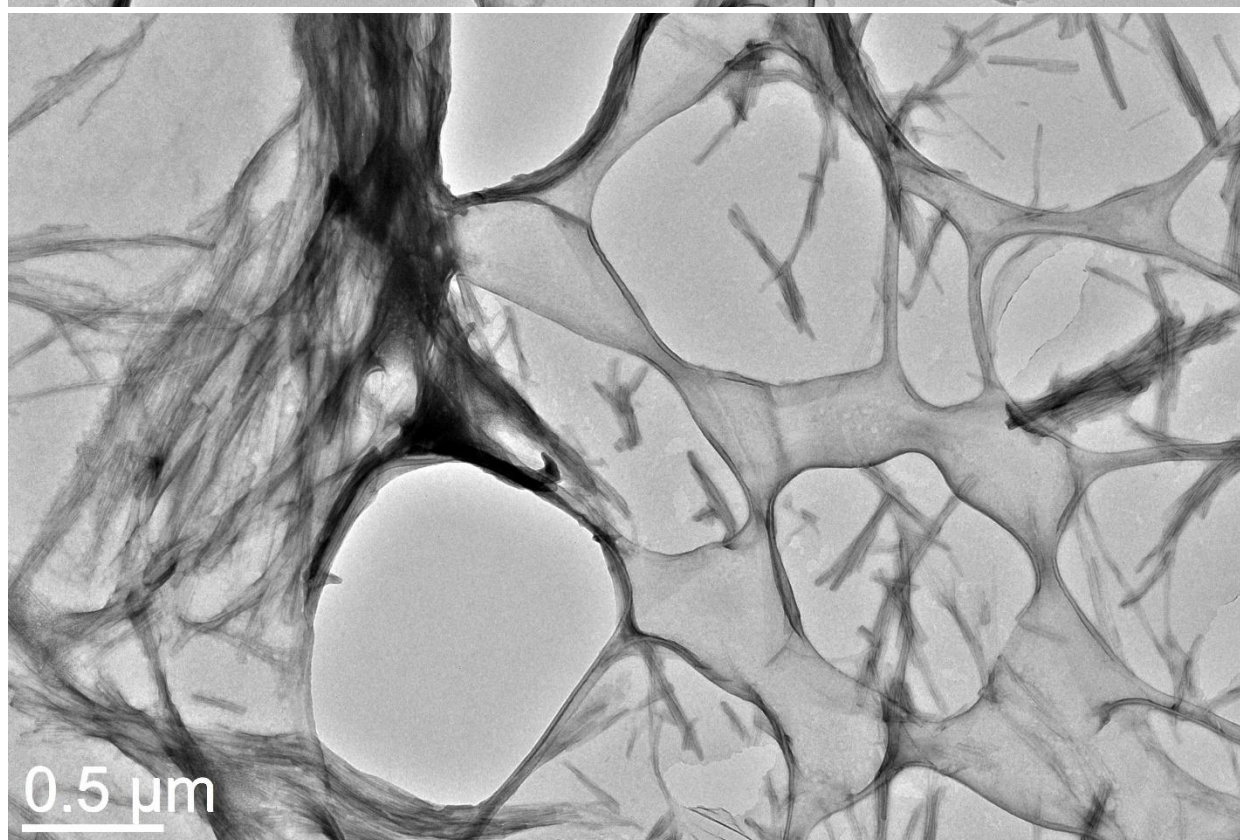



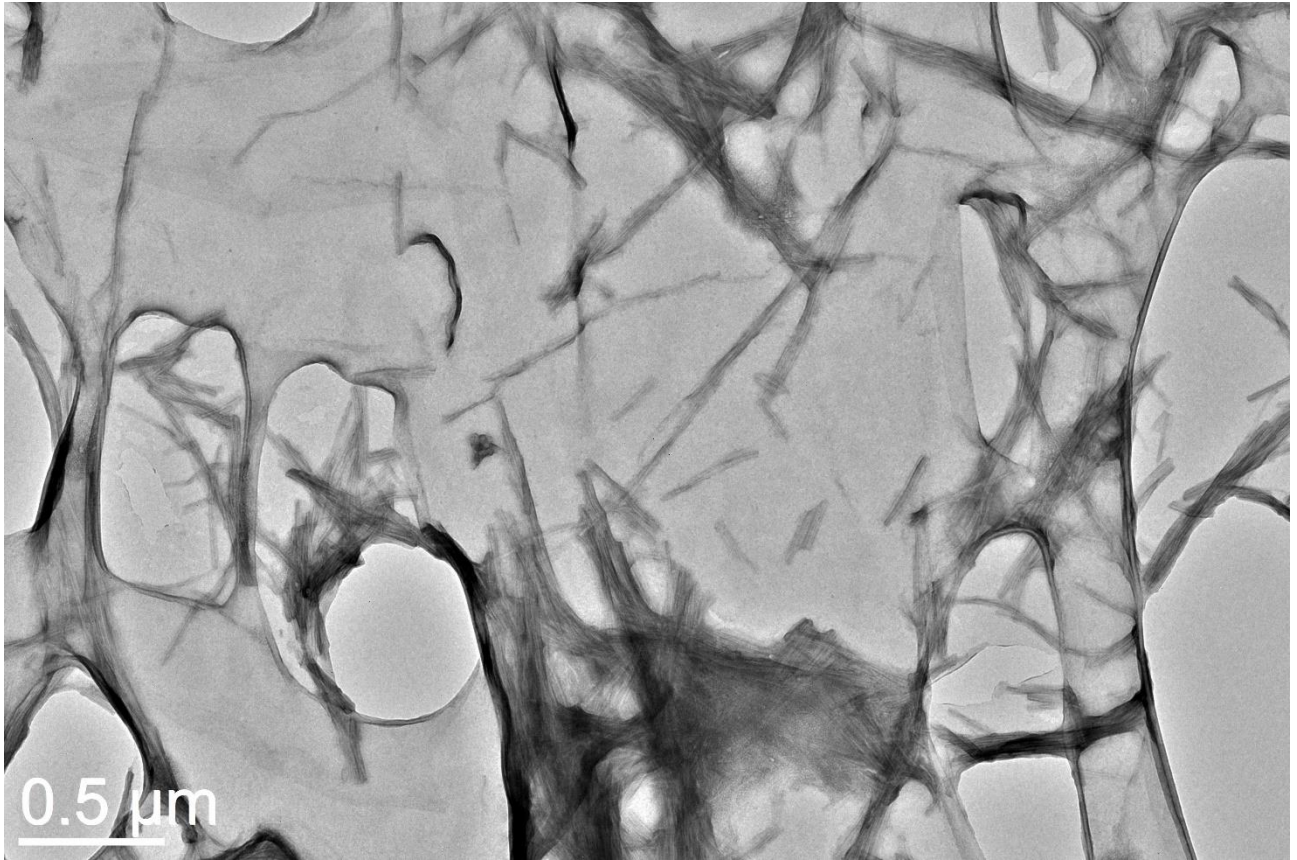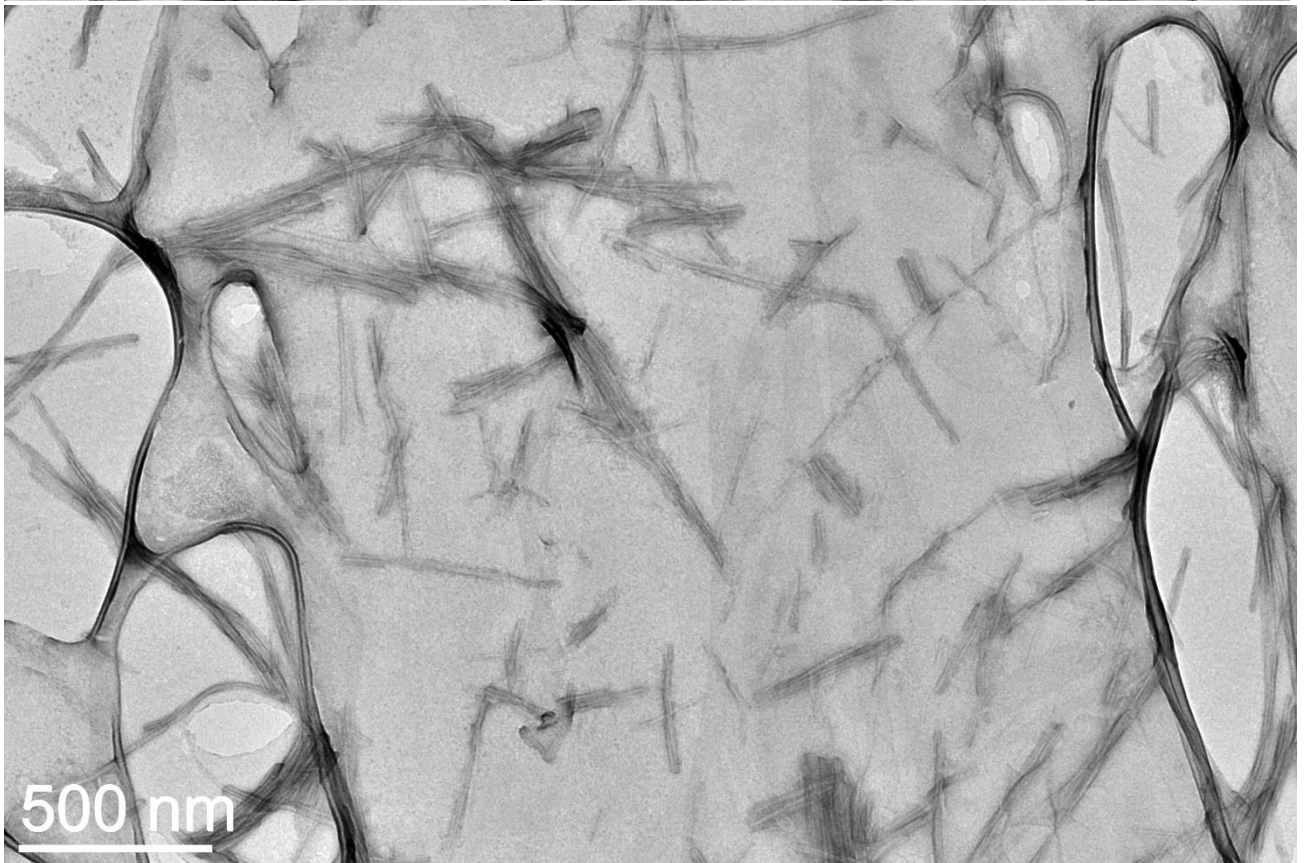

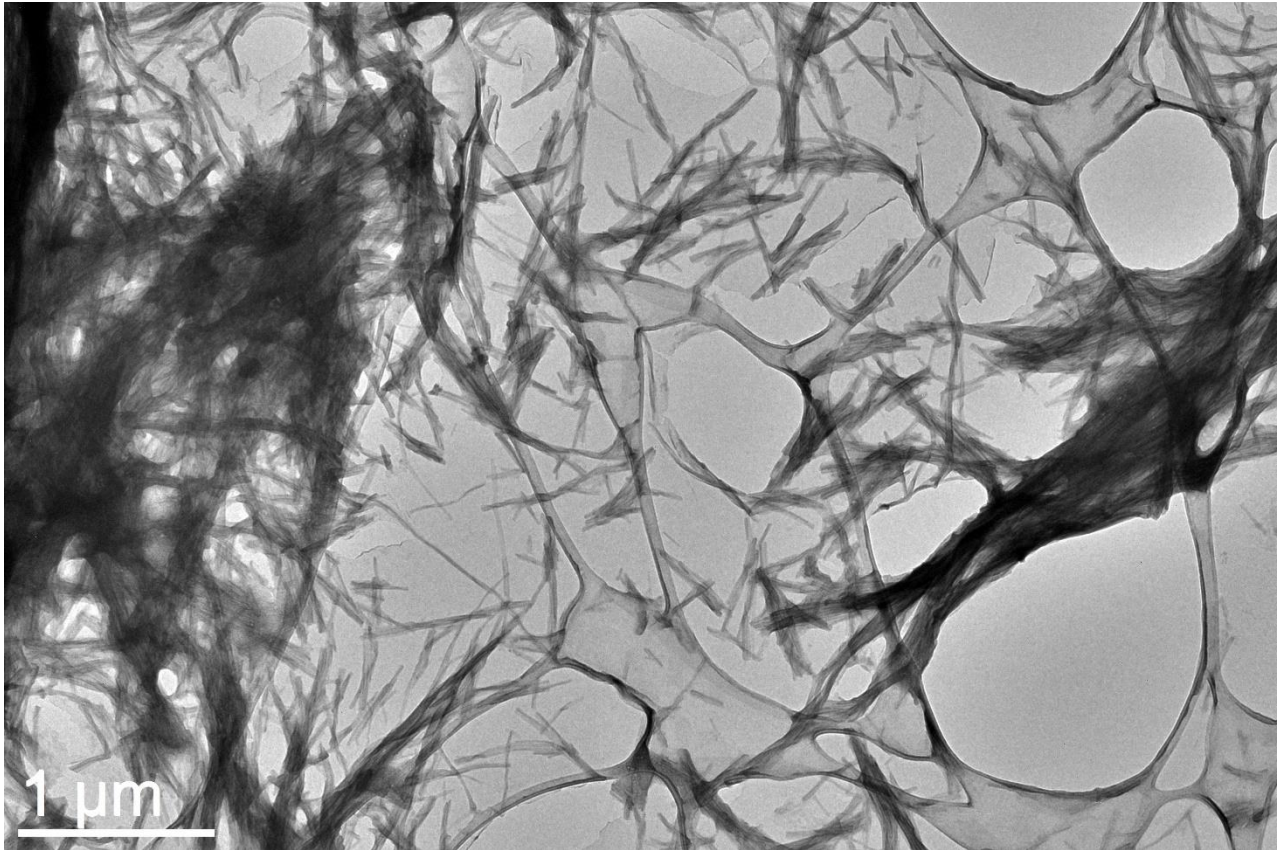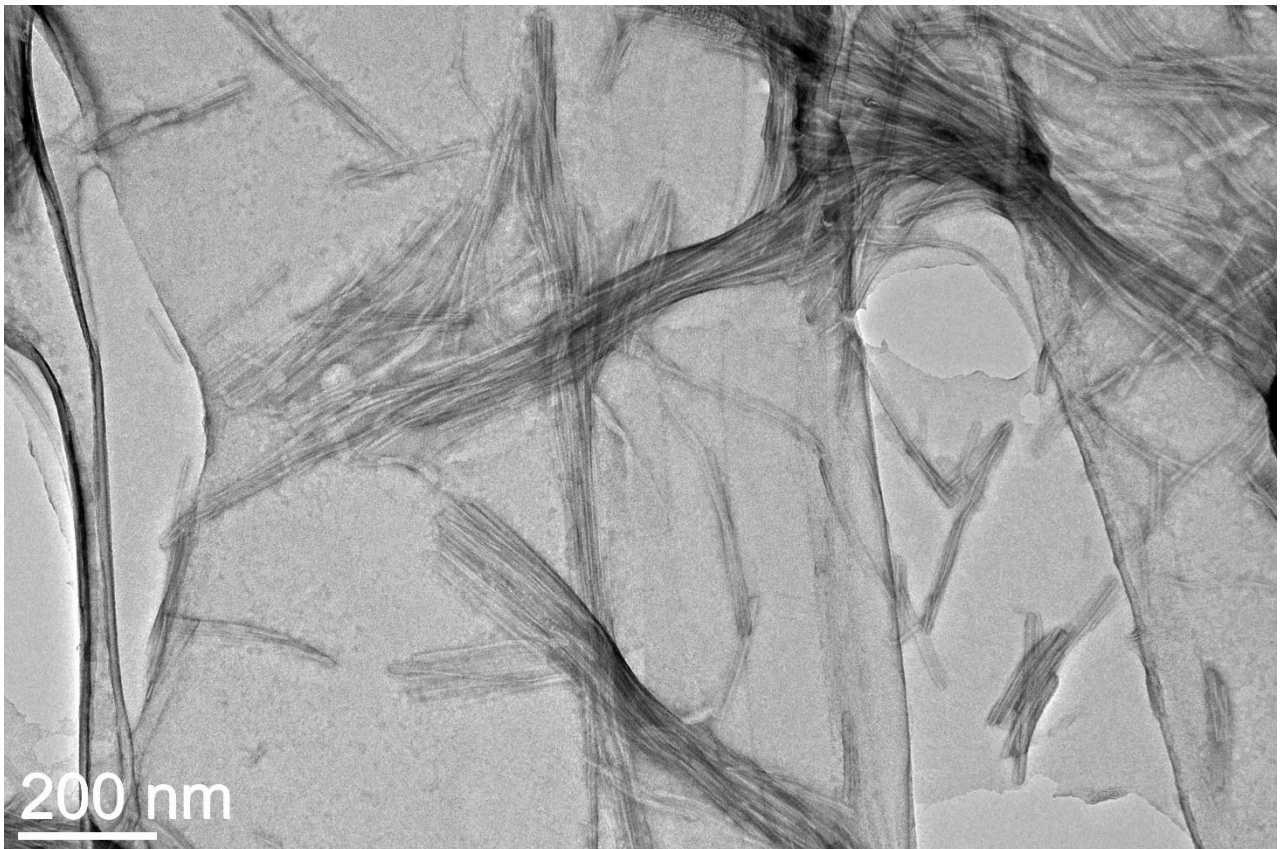

S4. TEM micrographs of insulin fibrils + Pff

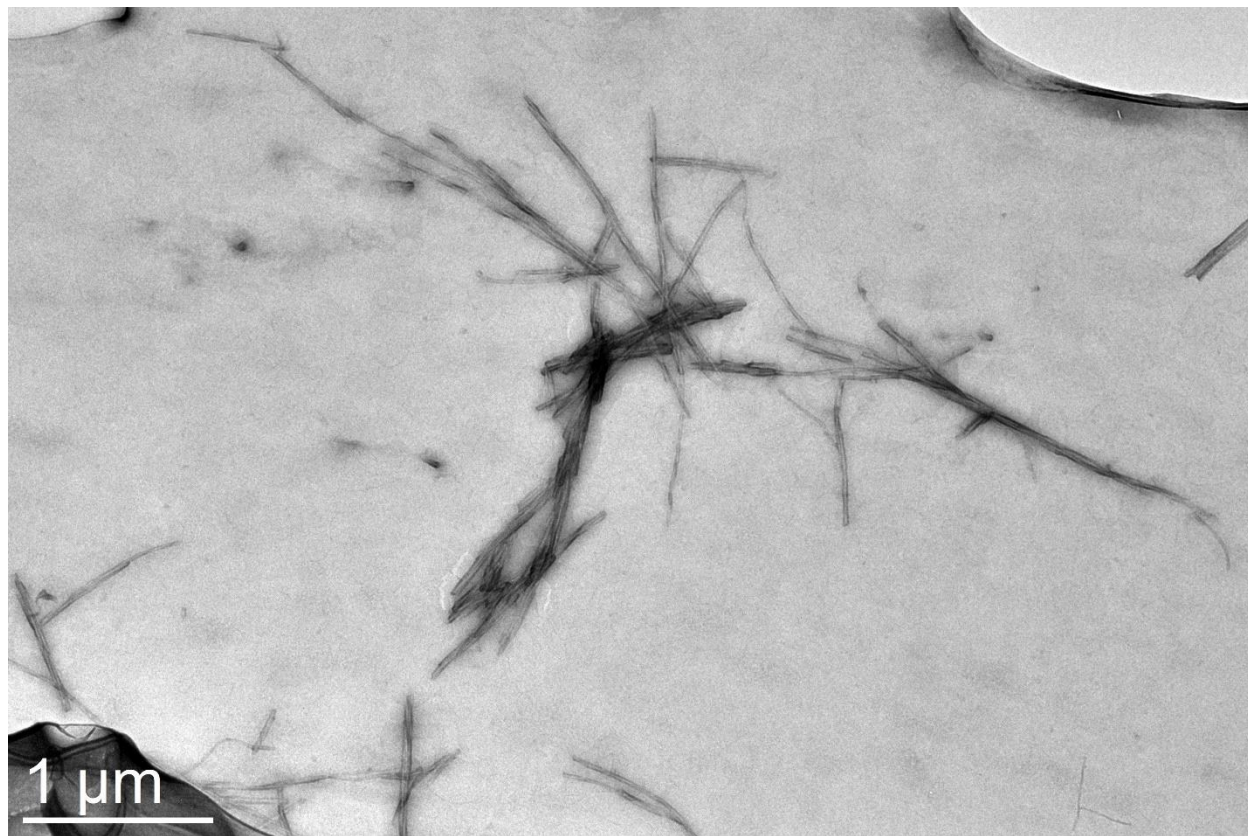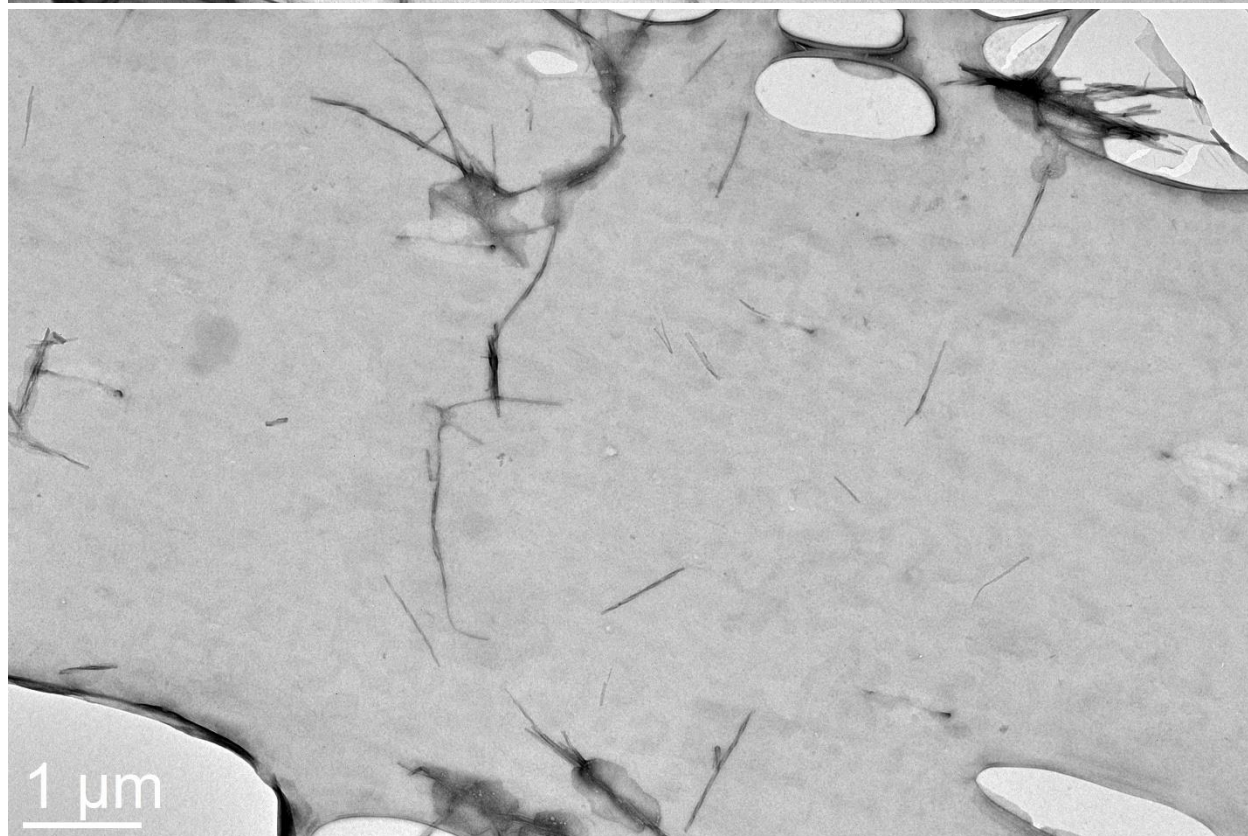

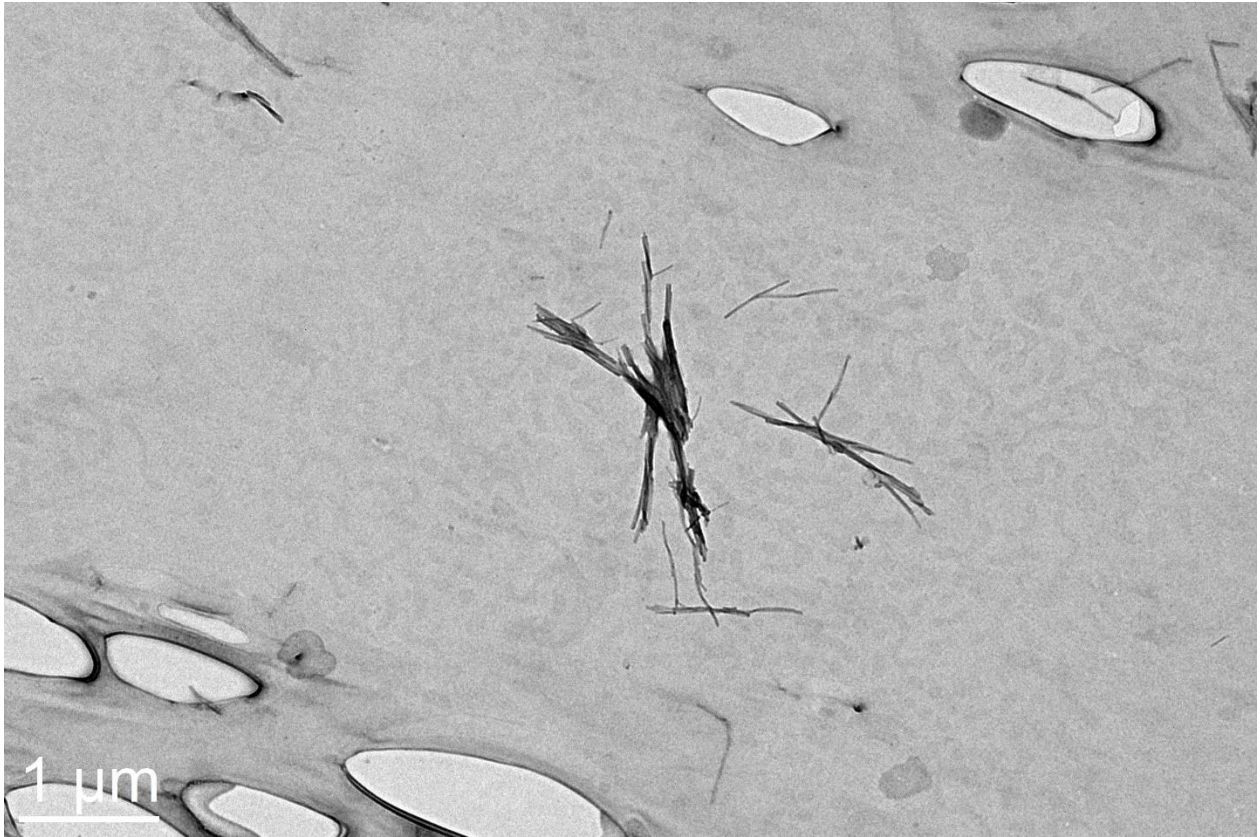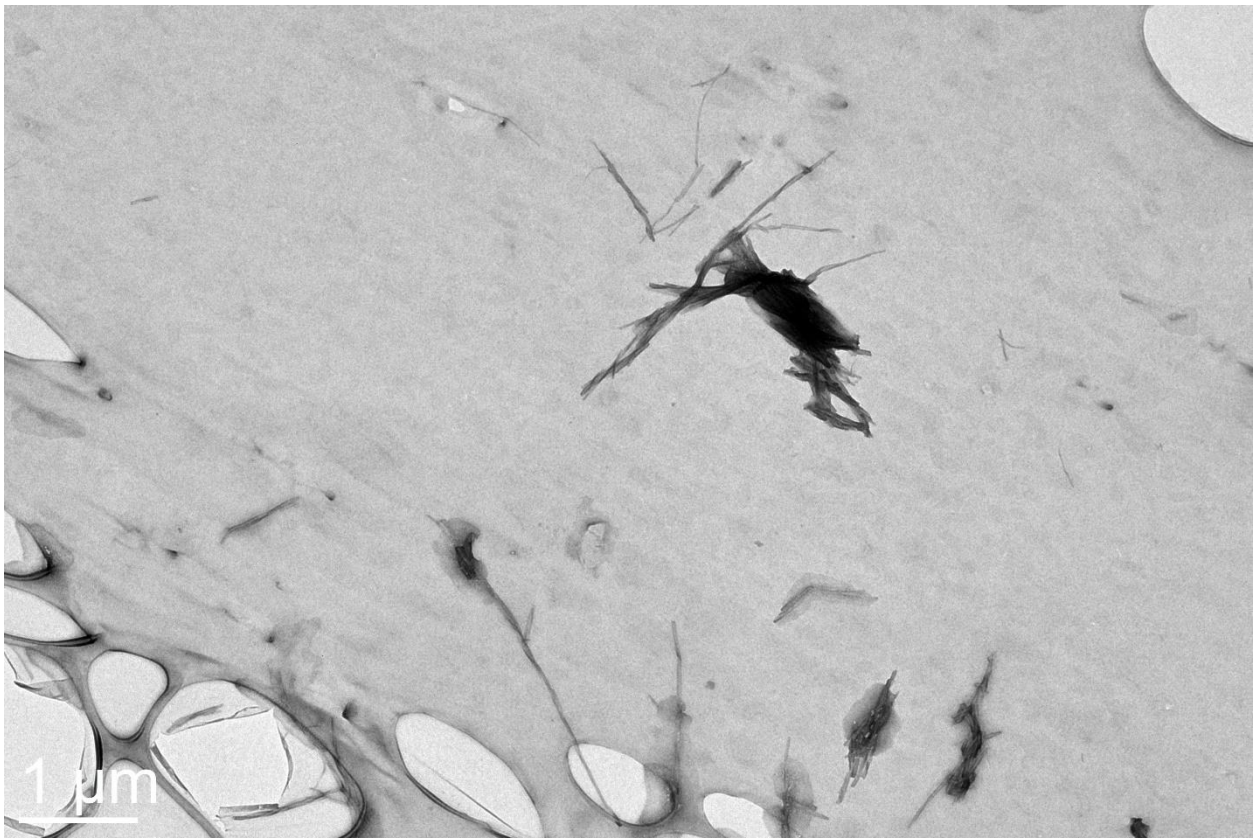

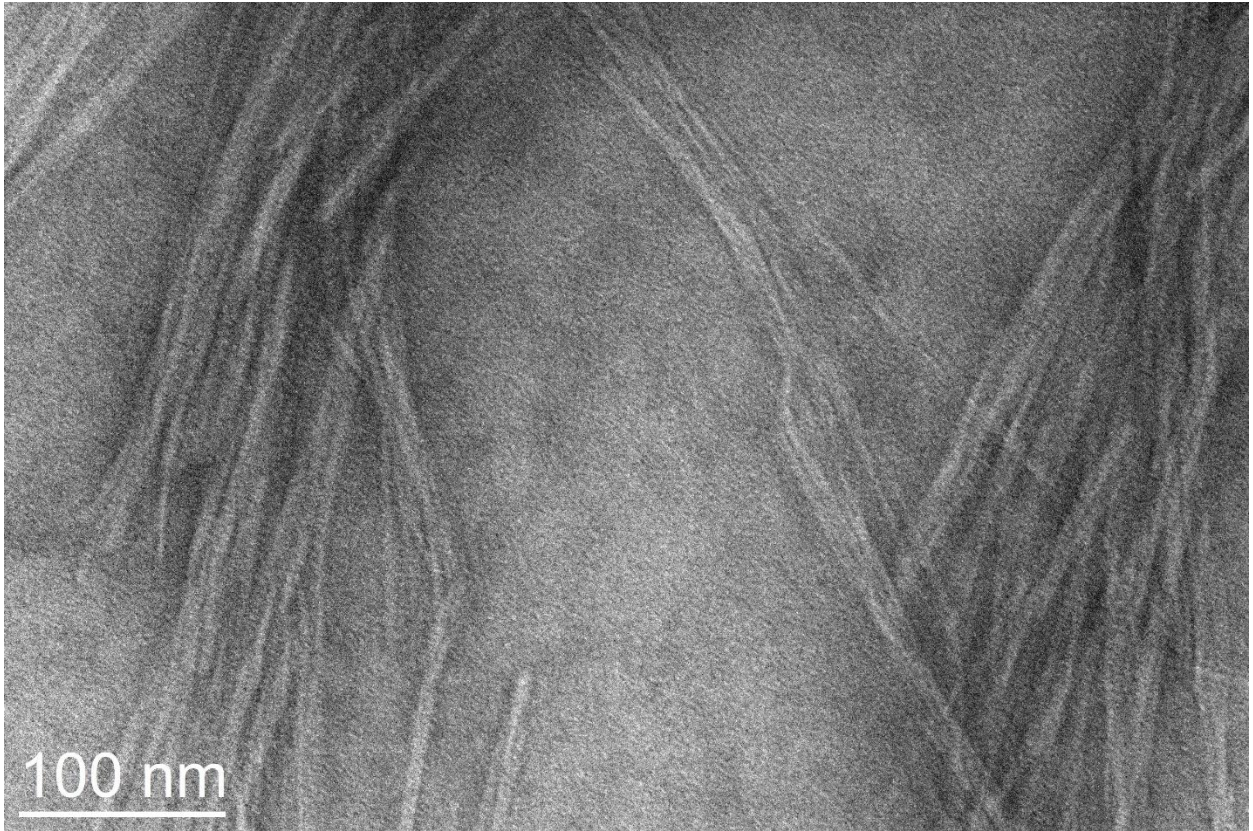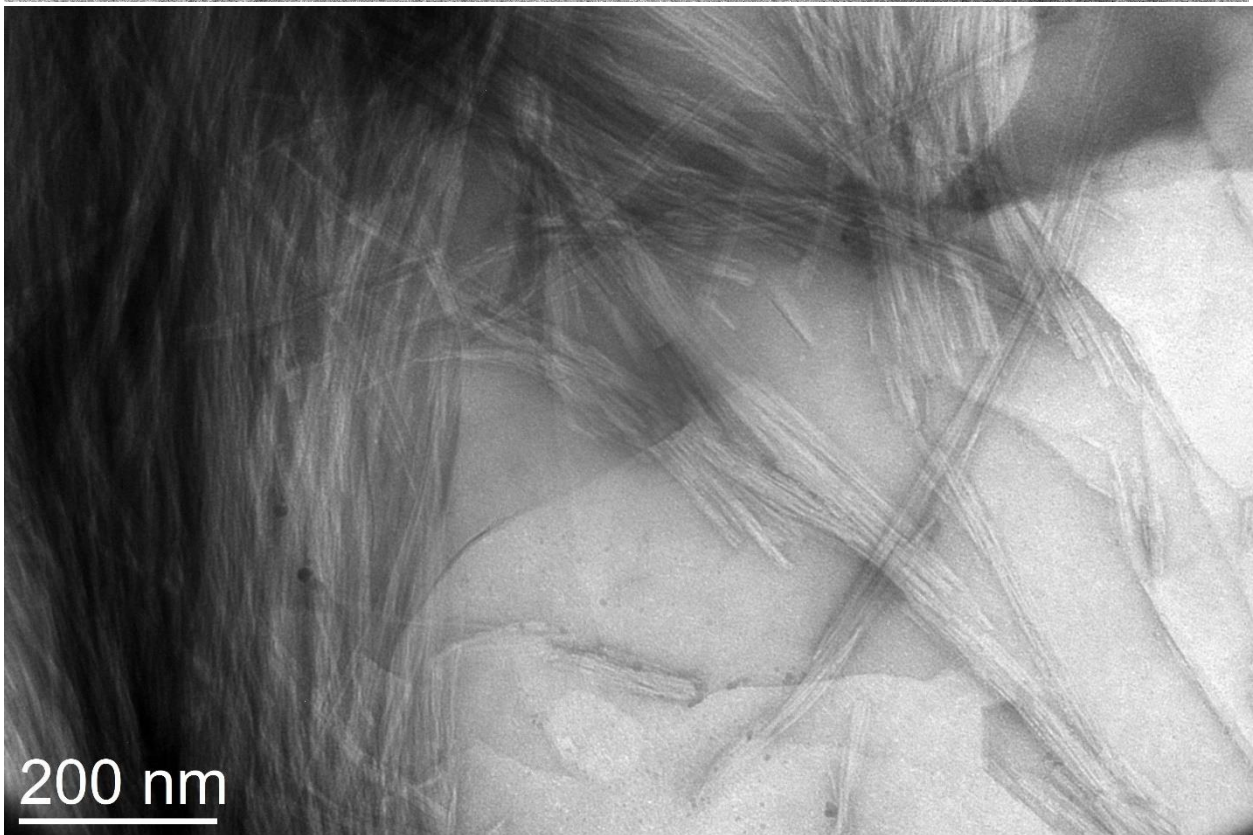

**S5.** TEM micrographs of the three tripeptides PFF, pFf and Pff (from top to bottom, respectively). Only the lacey carbon is clearly visible and not fibrils:

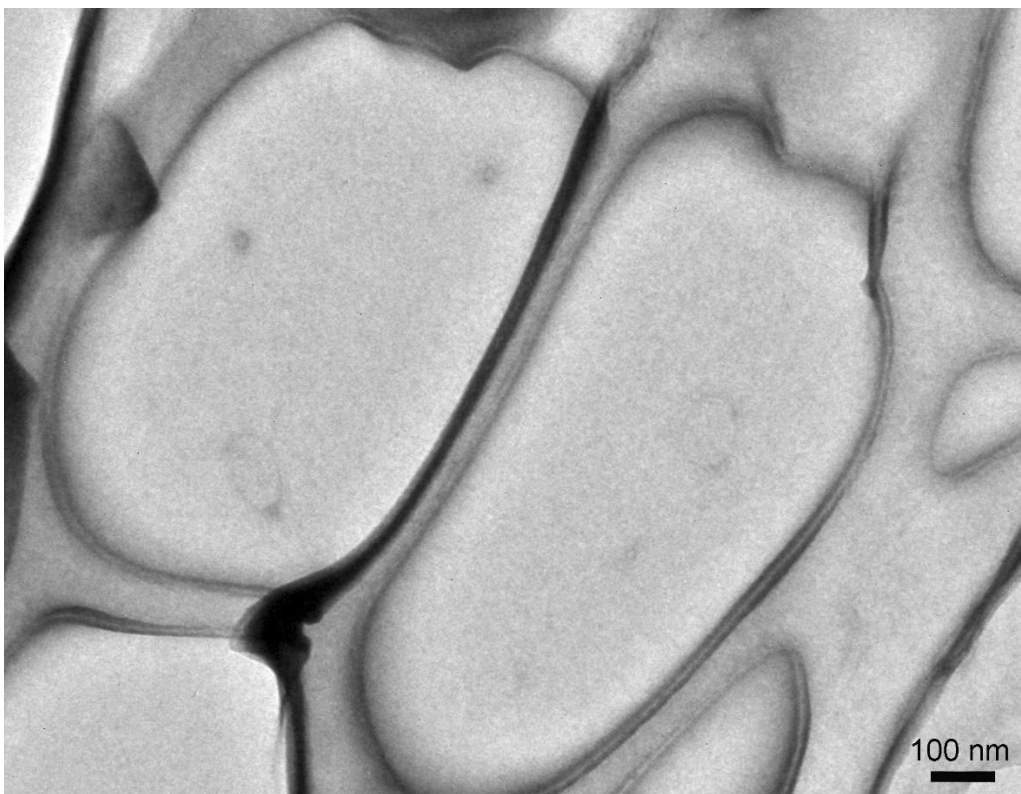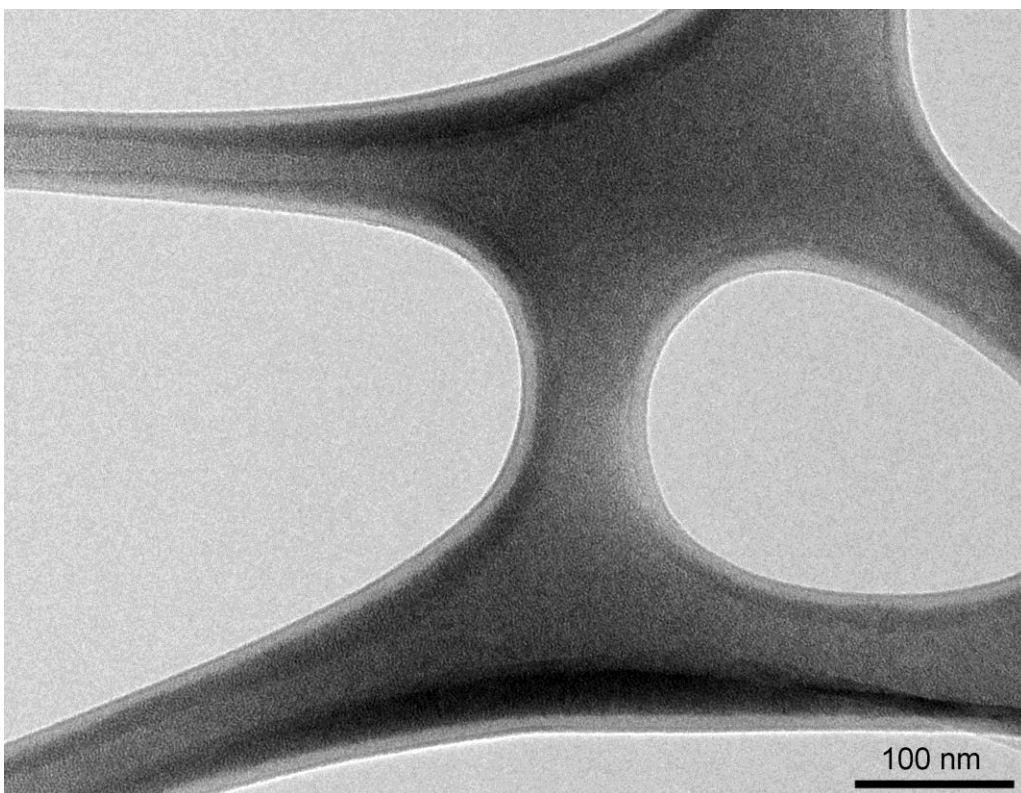

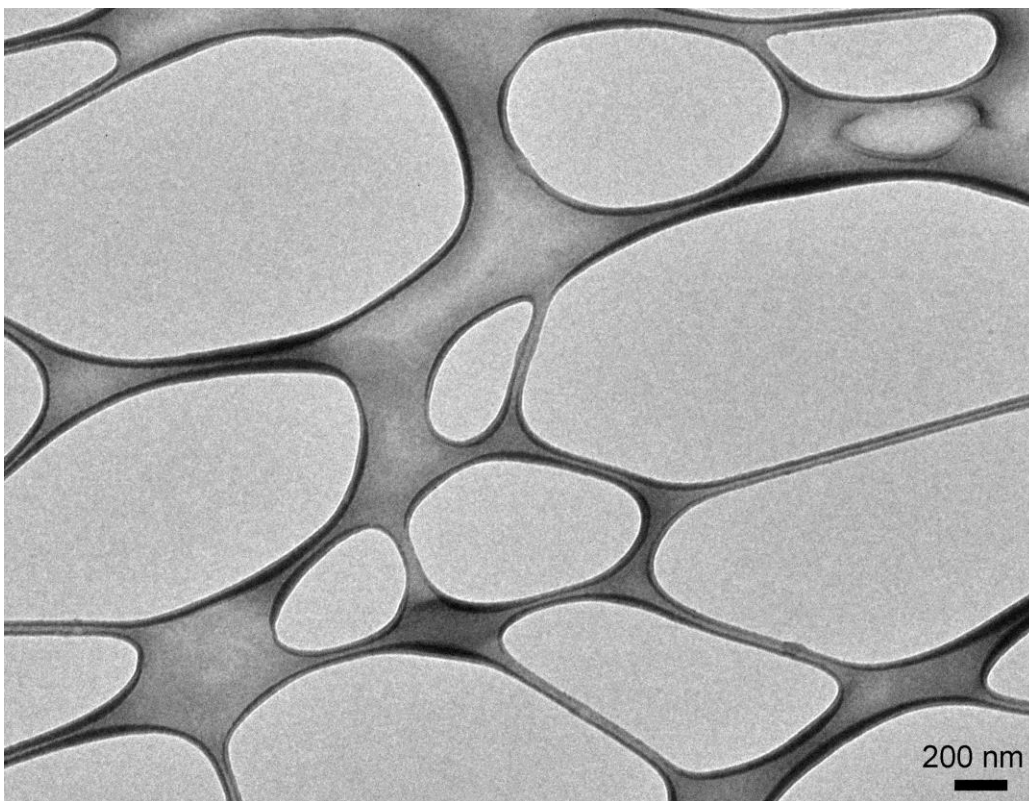

**S6.** CD spectra of the tripeptides PFF, pFf and Pff (from top to bottom, respectively, 0.34 mM):

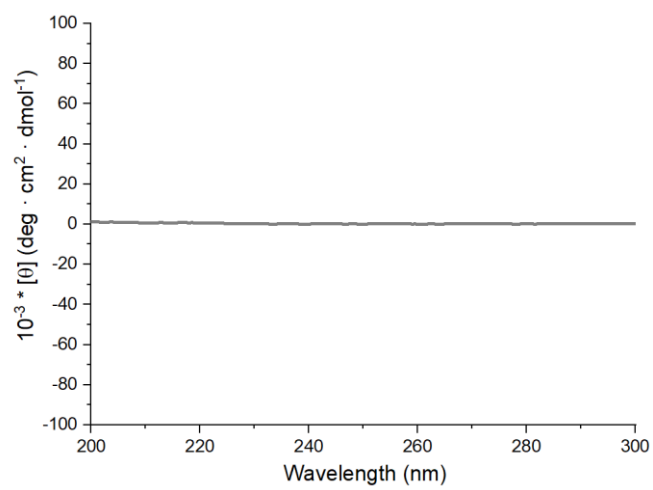

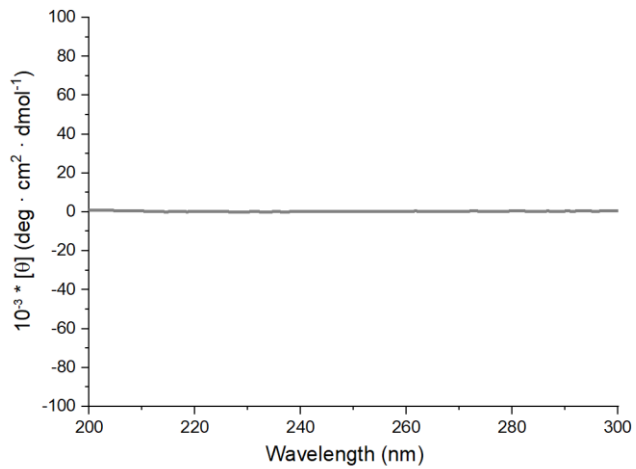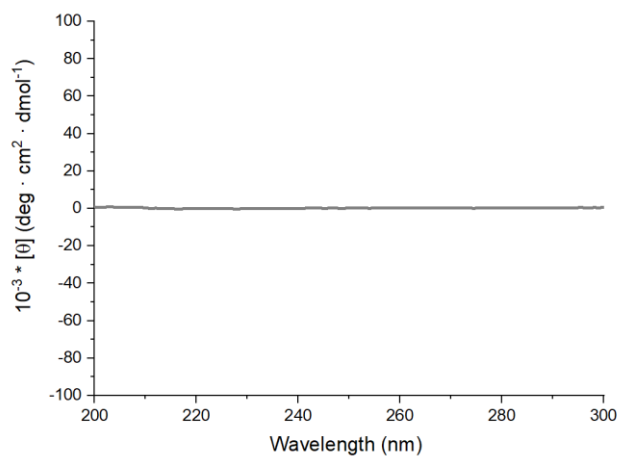

### S7.DSC data for PFF alone

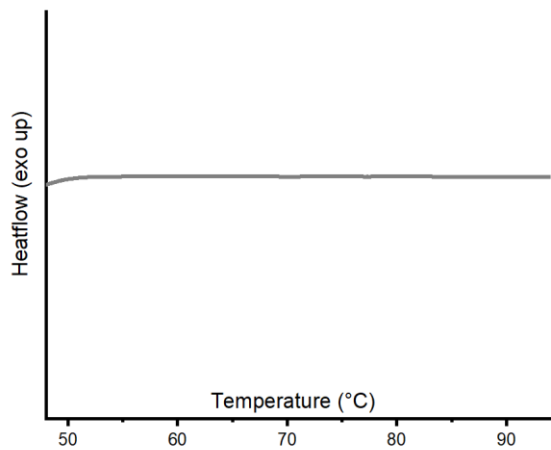



58. UVRR spectra

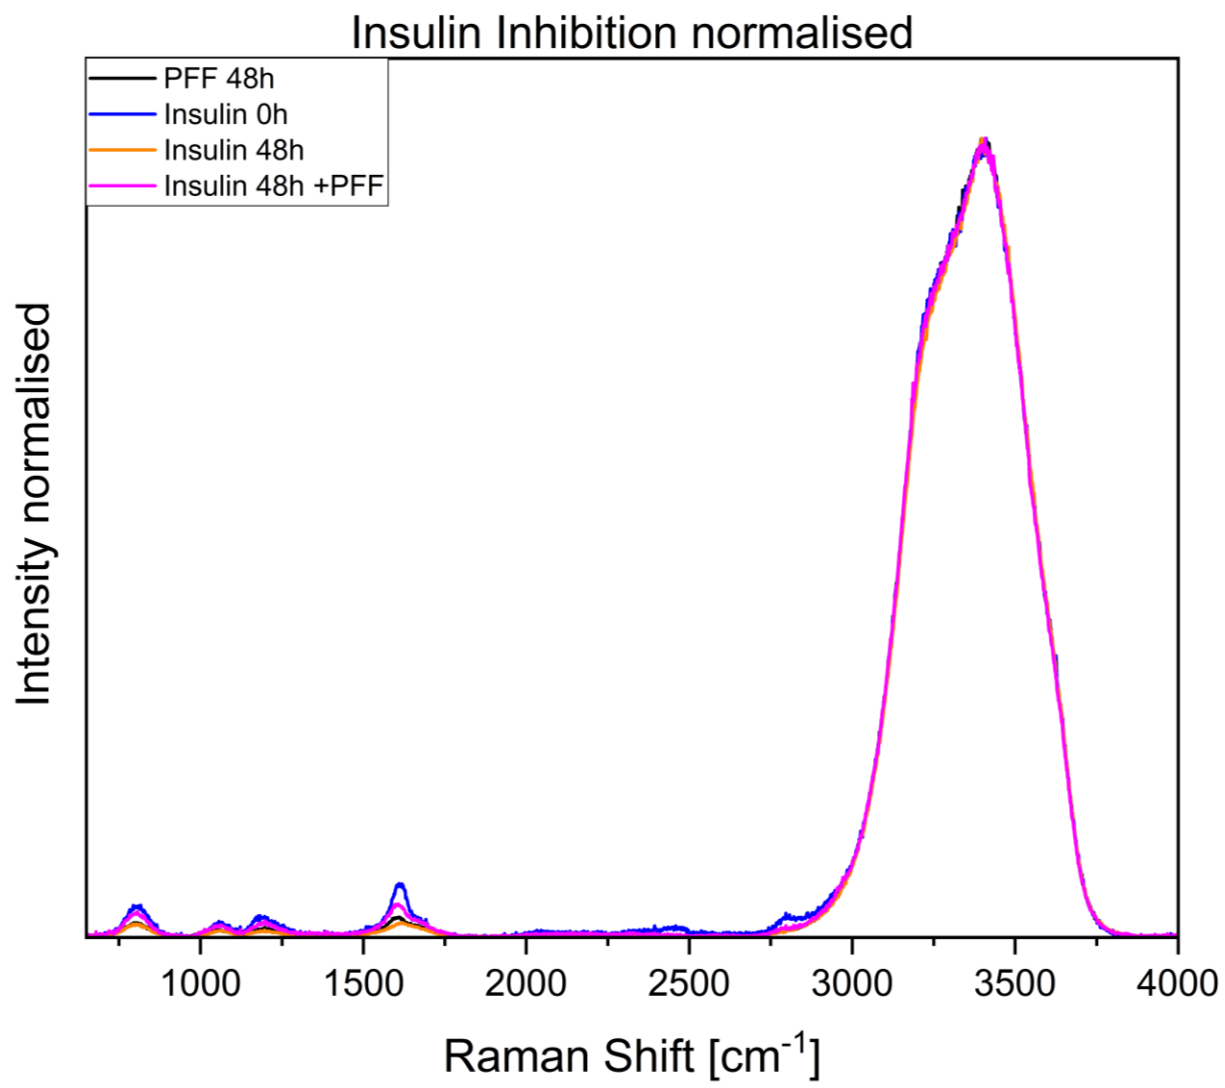

S9. MD all-atom simulations

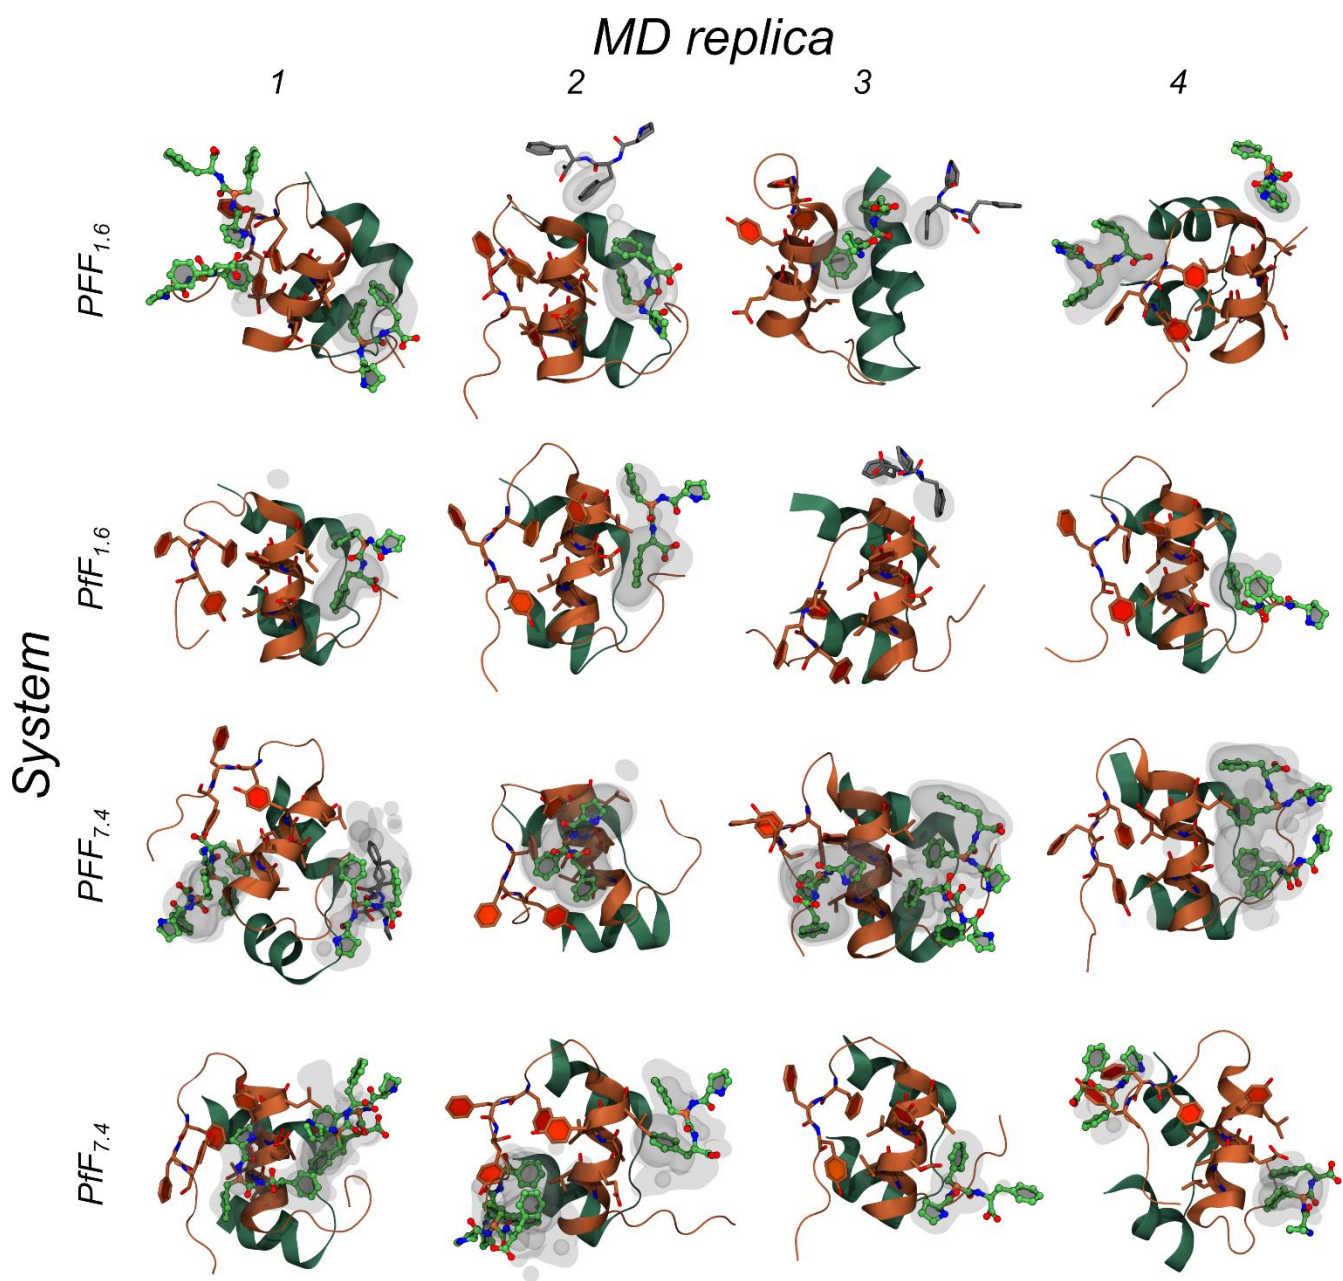

Supplement: d4nr00693c1.pdf [file d4nr00693c1.pdf]
